# Supplementary material
Source: PubMed Central journal article supplement (PMC6583475)
Supplement: jama-320-2231-s001.pdf [file jama-320-2231-s001.pdf]

## Supplementary Online Content

Inohara T, Manandhar P, Kosinski A, et al. Association of renin-angiotensin inhibitor treatment with mortality and heart failure readmission in patients with transcatheter aortic valve replacement. *JAMA*. doi:10.1001/jama.2018.18077

**eAppendix 1.** International Classification of Disease 9th and 10th revisions (ICD-9 and ICD-10) codes for each endpoint

**eAppendix 2.** List of covariates for generating propensity score

**eAppendix 3.** Patient-reported persistence on an RAS inhibitor at 30 days and 1 year

**eAppendix 4.** Detailed definition of vascular complication

### eReference

**eFigure 1.** Distributions of propensity scores according to RAS blockade therapy status in entire cohort

**eFigure 2.** Standardized differences before and after propensity score matching in pLVEF

**eFigure 3.** Standardized differences before and after propensity score matching in rLVEF

**eFigure 4.** Quality of life analysis cohort creation

**eTable 1.** Baseline characteristics of those who were included versus excluded

**eTable 2.** Falsification endpoints

**eTable 3.** Baseline characteristics after propensity score matching in sub-groups by LVEF

**eTable 4.** Baseline characteristics of those who were included versus excluded in KCCQ cohort

**eTable 5.** Association between the prescription of an RAS inhibitor at discharge and clinical outcomes by the type of an RAS inhibitor

**eTable 6.** The comparison of baseline characteristics between matched and unmatched patients

This supplementary material has been provided by the authors to give readers additional information about their work.

**eAppendix 1.** International Classification of Disease 9<sup>th</sup> and 10<sup>th</sup> revisions (ICD-9 and ICD-10) codes for each endpoint

|                               | International Classification of Disease 9th revision (ICD-9) code | International Classification of Disease 10th revision (ICD-10) code |
|-------------------------------|-------------------------------------------------------------------|---------------------------------------------------------------------|
| <b>Clinical endpoint</b>      |                                                                   |                                                                     |
| Heart failure readmission     | 398.x, 402.x1, 404.x1, 404.x3, 428.x                              | I0981, I110, I130, I132, I502x, I503x, I504x, I509                  |
| Myocardial infarction         | 410.x1, 410.x0                                                    | I21x, I22x                                                          |
| <b>Falsification endpoint</b> |                                                                   |                                                                     |
| Hip fracture                  | 820.x, 821.x                                                      | S72***A, S72***B, S72***C                                           |
| Urinary tract infection       | 595*                                                              | N30*, A5601                                                         |
| Pneumonia                     | 480.x, 481, 482.xx, 483.xx, 485, 486, 487.0, and 488.11           | J11.0x, J12.x, J13.x, J14.x, J15.x, J16.x, J18.x                    |

**eAppendix 2.** List of covariates for generating propensity score

- **Baseline characteristics and demographics:** age, sex, prior coronary artery bypass grafting, prior other cardiac surgery, prior aortic valve procedure, permanent pace maker and/or intra-cardiac defibrillator, atrial fibrillation, prior stroke, transient ischemic attack, peripheral arterial disease, hypertension, diabetes, chronic lung disease, prior myocardial infarction, NYHA within 2 weeks prior to admission, 5-meter walk test before TAVR (not performed vs. walk time >10 seconds or unable to walk vs. 6 seconds < walk time ≤ 10 seconds vs. walk time ≤ 6 seconds), STS PROM score, current dialysis and body mass index
- **Laboratory data at baseline:** GFR, hemoglobin, and albumin
- **Coronary anatomical information:** triple-vessel disease and left main stenosis
- **Echocardiographic findings before TAVR:** left ventricular ejection fraction, left ventricular internal systolic diameter, and left ventricular internal diastolic diameter
- **Echocardiographic findings after TAVR:** mean gradient, moderate or severe aortic insufficiency and moderate or severe mitral insufficiency
- **Medications at discharge:** warfarin, aspirin, dabigatran, beta blocker, antiarrhythmics, P2Y12, and factor Xa inhibitor
- **In-hospital adverse event:** myocardial infarction, stroke, vascular complication, new requirement for dialysis, and acute kidney injury defined as 0.3 mg/dl absolute or 50% relative increase in serum creatinine from baseline

Abbreviations: NYHA = New York Heart Association; TAVR = transcatheter aortic valve replacement; STS PROM = Society of Thoracic Surgeons predicted risk of mortality; GFR = glomerular filtration rate

**eAppendix 3.** Patient-reported persistence on an RAS inhibitor at 30 days and 1 year

| <b>Variable</b>                                              | <b>Level</b>    | <b>RAS (-)<br/>(N=7948)</b> |       | <b>RAS (+)<br/>(N=7948)</b> |       |
|--------------------------------------------------------------|-----------------|-----------------------------|-------|-----------------------------|-------|
| <b><u>Follow-up data on RAS inhibitor</u></b>                |                 |                             |       |                             |       |
|                                                              |                 |                             |       |                             |       |
| RAS inhibitor prescribed or taken at 30 days after procedure | Missing         | 1455                        | 18.3% | 1426                        | 17.9% |
|                                                              | 30 day RAS (-)  | 5531                        | 69.6% | 1071                        | 13.5% |
|                                                              | 30 day RAS (+)  | 813                         | 10.2% | 5332                        | 67.1% |
|                                                              | 30 day Death    | 149                         | 1.9%  | 119                         | 1.5%  |
| RAS inhibitor prescribed or taken at 1 year after procedure  | Missing         | 2404                        | 30.2% | 2466                        | 31.0% |
|                                                              | 365 day RAS (-) | 3352                        | 42.2% | 1193                        | 15.0% |
|                                                              | 365 day RAS (+) | 1005                        | 12.6% | 3294                        | 41.4% |
|                                                              | 365 day Death   | 1187                        | 14.9% | 995                         | 12.5% |

Abbreviations: RAS = renin-angiotensin system

#### **eAppendix 4.** Detailed definition of vascular complication

Vascular complication was defined according to the Valve Academic Research Consortium-2 consensus document (VARC-2)<sup>1</sup> and as any of the followings: 1) any aortic dissection, aortic rupture, annulus rupture, left ventricle perforation, or new apical aneurysm/pseudo-aneurysm; 2) access site or access-related vascular injury leading to death, life-threatening or major bleeding, visceral ischemia, or neurological impairment; 3) distal embolization (non-cerebral) from a vascular source requiring surgery or resulting in amputation or irreversible end-organ damage; 4) the use of unplanned endovascular or surgical intervention associated with death, major bleeding, visceral ischemia or neurological impairment; 5) any new ipsilateral lower extremity ischemia documented by patient symptoms, physical exam, and/or decreased or absent blood flow on lower extremity angiogram; 6) surgery for access site-related nerve injury; or 7) permanent access site-related nerve injury.

#### **eReference**

1. Kappetein AP, et al. Updated standardized endpoint definitions for transcatheter aortic valve implantation: the Valve Academic Research Consortium-2 consensus document. *Eur J Cardio Thorac Surg.* 2012;42:S45–S60

**eFigure 1.** Distributions of propensity scores according to RAS blockade therapy status in entire cohort

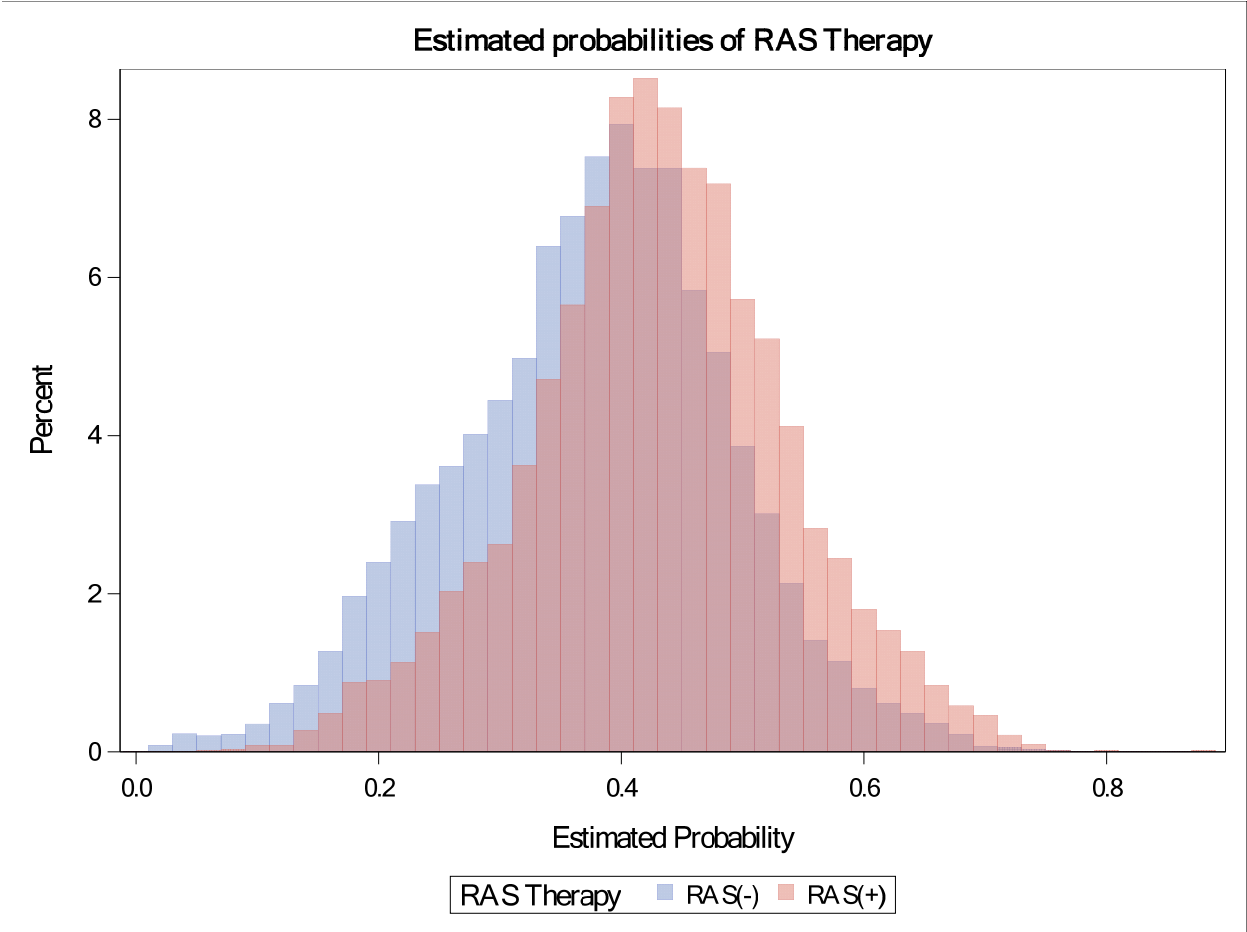

Abbreviation: RAS, renin-angiotensin system

**eFigure 2.** Standardized differences before and after propensity score matching in pLVEF

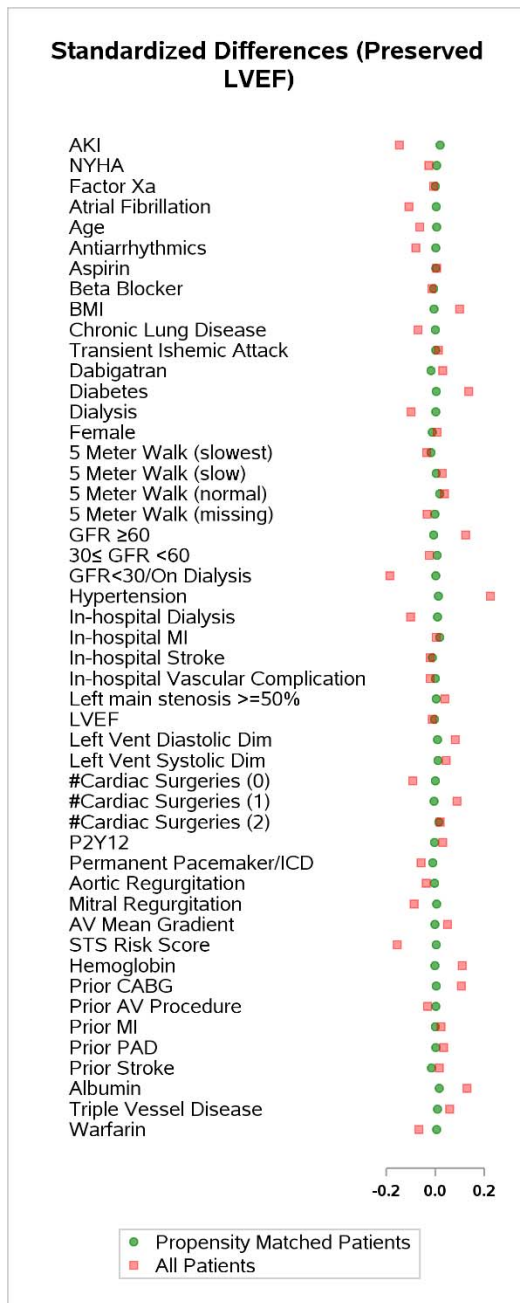

pLVEF = preserved left ventricular ejection fraction; AKI = acute kidney injury; NYHA = New York Heart Association functional class; BMI = body mass index; GFR = glomerular filtration rate; MI = myocardial infarction; LVEF = left ventricular ejection fraction; Left Vent Diastolic Dim = left ventricular diastolic diameter; Left Vent Systolic Dim = left ventricular systolic diameter; ICD = intracardiac defibrillator; STS = Society of Thoracic Surgeons; CABG = coronary artery bypass grafting; AV = aortic valve; PAD = peripheral artery disease

**eFigure 3.** Standardized differences before and after propensity score matching in rLVEF

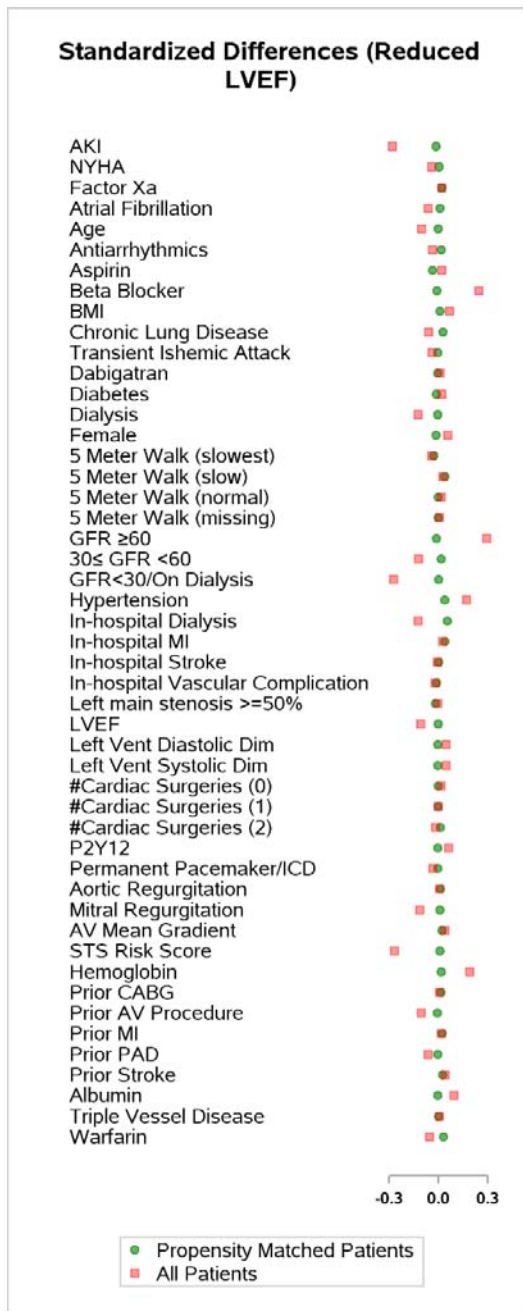

rLVEF = reduced left ventricular ejection fraction; AKI = acute kidney injury; NYHA = New York Heart Association functional class; BMI = body mass index; GFR = glomerular filtration rate; MI = myocardial infarction; LVEF = left ventricular ejection fraction; Left Vent Diastolic Dim = left ventricular diastolic diameter; Left Vent Systolic Dim = left ventricular systolic diameter; ICD = intracardiac defibrillator; STS = Society of Thoracic Surgeons; CABG = coronary artery bypass grafting; AV = aortic valve; PAD = peripheral artery disease



**eFigure 4.** Quality of life analysis cohort creation

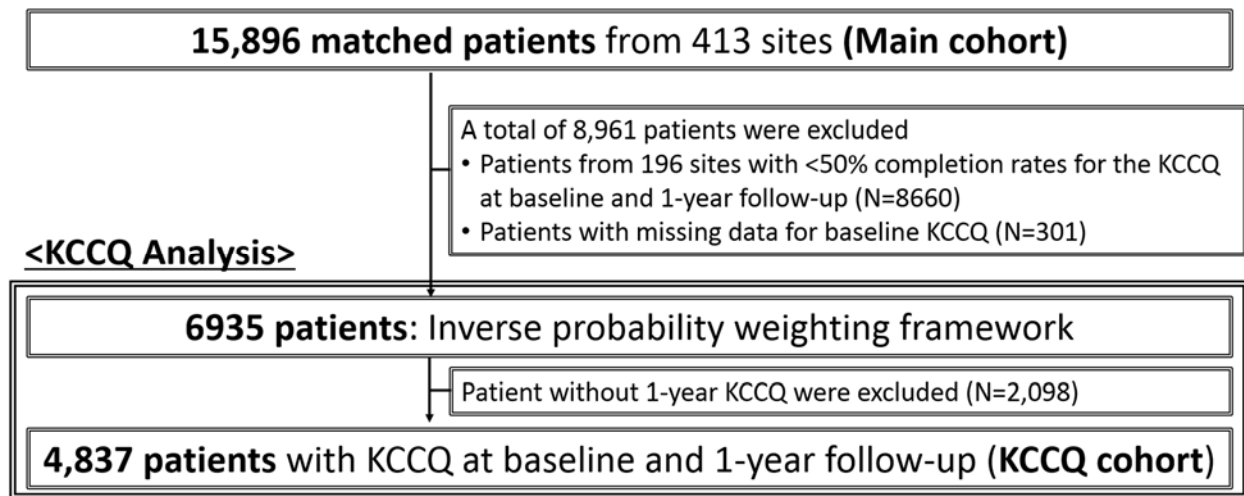

KCCQ = Kansas City Cardiomyopathy Questionnaire

**eTable 1.** Baseline characteristics of those who were included versus excluded

|                                               | Included     | Excluded     | P-value |
|-----------------------------------------------|--------------|--------------|---------|
|                                               | (N=21312)    | (N=16247)    |         |
| RAS blockade therapy, N (%)                   |              |              | <0.001  |
| Missing                                       | 0 (0.0)      | 1450 (8.9)   |         |
| No                                            | 12844 (60.3) | 7864 (48.4)  |         |
| Yes                                           | 8468 (39.7)  | 5375 (33.1)  |         |
| Contraindicated                               | 0 (0.0)      | 1558 (9.6)   |         |
| Age, mean (SD), y                             | 82.6 (6.9)   | 80.1 (8.4)   | <.001   |
| Body mass index, mean (SD), kg/m <sup>2</sup> | 28.0 (6.5)   | 28.7 (7.1)   | <.001   |
| Female, No. (%)                               | 10070 (47.3) | 7420 (45.7)  | 0.003   |
| STS PROM, mean (SD), %                        | 8.0 (5.7)    | 7.9 (6.3)    | <.001   |
| STS PROM category, N (%)                      |              |              | <.001   |
| STS PROM ≥ 15                                 | 2044 (9.6)   | 1618 (10.0)  |         |
| 8 ≤ STS PROM < 15                             | 5586 (26.2)  | 4054 (25.0)  |         |
| 4 ≤ STS PROM < 8                              | 9084 (42.6)  | 6459 (39.8)  |         |
| STS PROM < 4                                  | 4598 (21.6)  | 4107 (25.3)  |         |
| Medical History, No. (%)                      |              |              |         |
| Prior CABG                                    | 5766 (27.1)  | 4401 (27.1)  | 0.945   |
| Prior aortic valve procedure                  | 2778 (13.0)  | 2407 (14.8)  | <.001   |
| Permanent pacemaker or ICD                    | 4023 (18.9)  | 2862 (17.6)  | 0.002   |
| Atrial fibrillation or flutter                | 9015 (42.3)  | 6418 (39.5)  | <.001   |
| Prior stroke                                  | 2562 (12.0)  | 1999 (12.3)  | 0.406   |
| Prior transient ischemic attack               | 1904 (8.9)   | 1402 (8.6)   | 0.303   |
| Peripheral arterial disease                   | 6392 (30.0)  | 4934 (30.4)  | 0.445   |
| Hypertension                                  | 19239 (90.3) | 14487 (89.2) | <.001   |
| Diabetes Mellitus                             | 7748 (36.4)  | 6510 (40.1)  | <.001   |
| Chronic lung disease                          | 5606 (26.3)  | 4533 (27.9)  | <.001   |
| Prior myocardial infarction                   | 5070 (23.8)  | 4193 (25.8)  | <.001   |
| Triple vessel disease                         | 5574 (26.2)  | 4300 (26.5)  | 0.442   |
| Left main disease                             | 2091 (9.8)   | 1592 (9.8)   | 0.946   |
| NYHA Class within 2 weeks, No (%)             |              |              | <.001   |
| Class I or II                                 | 4045 (19.0)  | 2772 (17.1)  |         |
| Class III or IV                               | 17098 (80.2) | 13333 (82.1) |         |
| Five meter walk test                          |              |              | 0.001   |
| Slowest (>10 seconds)                         | 6376 (35.3)  | 4939 (36.8)  |         |
| Slow (>6 seconds but ≤10 seconds)             | 7490 (41.5)  | 5302 (39.5)  |         |
| Normal (≤6 seconds)                           | 4160 (23.1)  | 3175 (23.6)  |         |

|                                      | Included<br>(N=21312) | Excluded<br>(N=16247) | P-value |
|--------------------------------------|-----------------------|-----------------------|---------|
| Laboratory data                      |                       |                       |         |
| GFR, mean (SD)                       | 61.9 (25.8)           | 61.7 (28.5)           | 0.055   |
| GFR category, N (%)                  |                       |                       | <.001   |
| GFR $\geq$ 60                        | 10715 (50.3)          | 8029 (49.4)           |         |
| 30 $\leq$ GFR < 60                   | 8749 (41.0)           | 6455 (39.7)           |         |
| On dialysis or GFR < 30              | 1811 (8.5)            | 1714 (10.5)           |         |
| Hemoglobin, mean (SD), g/dL          | 11.9 (1.9)            | 11.8 (2.0)            | 0.087   |
| Albumin, mean (SD), g/dL             | 3.7 (0.5)             | 3.7 (0.5)             | 0.001   |
| Pre-procedure echocardiogram         |                       |                       |         |
| LVEF, mean (SD), %                   | 52.0 (11.4)           | 50.9 (12.3)           | <.001   |
| LV systolic diameter, mean (SD), cm  | 3.3 (0.9)             | 3.4 (1.0)             | <.001   |
| LV diastolic diameter, mean (SD), cm | 4.6 (0.9)             | 4.7 (0.9)             | <.001   |
| Post-procedure echocardiogram        |                       |                       |         |
| Moderate/severe AR, N (%)            | 842 (4.6)             | 643 (4.7)             | 0.847   |
| Moderate/severe MR, N (%)            | 3210 (17.7)           | 2379 (17.3)           | 0.468   |
| Medication at discharge              |                       |                       |         |
| Beta blocker, N (%)                  | 14633 (68.7)          | 10182 (62.7)          | 0.752   |
| In-hospital complication             |                       |                       |         |
| Myocardial infarction, N (%)         | 43 (0.2)              | 71 (0.4)              | <.001   |
| Stroke, N (%)                        | 360 (1.7)             | 394 (2.4)             | <.001   |
| Vascular complication, N (%)         | 847 (4.0)             | 803 (4.9)             | <.001   |
| New requirement for dialysis, N (%)  | 102 (0.5)             | 288 (1.8)             | <.001   |

Abbreviations: RAS = renin-angiotensin system; SD = standard deviation; STS PROM = Society of Thoracic Surgeons predicted risk of mortality; CABG = coronary artery bypass graft surgery; ICD = intra-cardiac defibrillator; NYHA = New York Heart Association; GFR = glomerular filtration rate; LVEF = left ventricular ejection fraction; LV = left ventricular; AR = aortic regurgitation; MR = mitral regurgitation

**eTable 2.** Falsification endpoints

| 1-year outcome | RAS (-)       | RAS (+)       | ARD (95%CI), %        | HR (95%CI)          | P-value |
|----------------|---------------|---------------|-----------------------|---------------------|---------|
|                | (N=7948)      | (N=7948)      |                       |                     |         |
| UTI            | 18<br>(0.2%)  | 18<br>(0.2%)  | 0.00 (-0.15 to 0.15)  | 1.00 (0.50 to 2.00) | 1       |
| Hip Fracture   | 155<br>(2.0%) | 139<br>(1.7%) | -0.20 (-0.62 to 0.22) | 0.90 (0.72 to 1.12) | 0.34    |
| Pneumonia      | 317<br>(4.0%) | 284<br>(3.6%) | -0.42 (-1.00 to 0.18) | 0.89 (0.77 to 1.04) | 0.15    |

Abbreviations: RAS = renin-angiotensin system; ARD = absolute risk difference; HR = hazard ratio; UTI = urinary tract infection

**eTable 3.** Baseline characteristics after propensity score matching in sub-groups by LVEF

| Characteristics                               | Preserved LVEF |             | Standardized difference | Reduced LVEF |             | Standardized difference |
|-----------------------------------------------|----------------|-------------|-------------------------|--------------|-------------|-------------------------|
|                                               | RAS (-)        | RAS (+)     |                         | RAS (-)      | RAS (+)     |                         |
|                                               | (N=6471)       | (N=6471)    |                         | (N=1477)     | (N=1477)    |                         |
| Age, mean (SD), y                             | 82.6 (6.9)     | 82.6 (6.7)  | 0.0051                  | 81.7 (7.2)   | 81.7 (7.0)  | -0.0029                 |
| Body mass index, mean (SD), kg/m <sup>2</sup> | 28.6 (6.7)     | 28.6 (6.7)  | -0.0054                 | 27.1 (5.8)   | 27.2 (5.9)  | 0.0073                  |
| Female, No. (%)                               | 3383 (52.3)    | 3340 (51.6) | -0.0133                 | 464 (31.4)   | 452 (30.6)  | -0.0161                 |
| STS PROM, mean (SD), %                        | 7.0 (4.6)      | 7.1 (4.7)   | 0.0031                  | 9.4 (6.4)    | 9.5 (6.2)   | 0.0082                  |
| STS PROM category, N (%)                      |                |             | 0.0263                  |              |             | 0.0718                  |
| STS PROM ≥ 15                                 | 375 (5.8)      | 401 (6.2)   |                         | 211 (14.3)   | 231 (15.6)  |                         |
| 8 ≤ STS PROM < 15                             | 1536 (23.7)    | 1509 (23.3) |                         | 504 (34.1)   | 487 (33.0)  |                         |
| 4 ≤ STS PROM < 8                              | 2936 (45.4)    | 2985 (46.1) |                         | 573 (38.8)   | 543 (36.8)  |                         |
| STS PROM < 4                                  | 1624 (25.1)    | 1576 (24.4) |                         | 189 (12.8)   | 216 (14.6)  |                         |
| Medical History, No. (%)                      |                |             |                         |              |             |                         |
| Prior CABG                                    | 1720 (26.6)    | 1729 (26.7) | 0.0031                  | 549 (37.2)   | 557 (37.7)  | 0.0123                  |
| Prior aortic valve procedure                  | 717 (11.1)     | 719 (11.1)  | 0.0009                  | 279 (18.9)   | 274 (18.6)  | -0.0087                 |
| Permanent pacemaker or ICD                    | 964 (14.9)     | 940 (14.5)  | -0.0104                 | 479 (32.4)   | 475 (32.2)  | -0.0055                 |
| Atrial fibrillation or flutter                | 2445 (37.8)    | 2455 (37.9) | 0.0026                  | 720 (48.7)   | 725 (49.1)  | 0.0068                  |
| Prior stroke                                  | 830 (12.8)     | 794 (12.3)  | -0.0169                 | 174 (11.8)   | 185 (12.5)  | 0.0228                  |
| Prior transient ischemic attack               | 598 (9.2)      | 598 (9.2)   | 0.0007                  | 122 (8.3)    | 120 (8.1)   | -0.0049                 |
| Peripheral arterial disease                   | 1947 (30.1)    | 1952 (30.2) | 0.0015                  | 474 (32.1)   | 472 (32.0)  | -0.0046                 |
| Hypertension                                  | 6084 (94.0)    | 6103 (94.3) | 0.0122                  | 1319 (89.3)  | 1336 (90.5) | 0.0370                  |
| Diabetes Mellitus                             | 2470 (38.2)    | 2480 (38.3) | 0.0033                  | 604 (40.9)   | 597 (40.4)  | -0.0124                 |
| Chronic lung disease                          | 1531 (23.7)    | 1532 (23.7) | -0.0011                 | 428 (29.0)   | 448 (30.3)  | 0.0275                  |
| Prior myocardial infarction                   | 1346 (20.8)    | 1345 (20.8) | 0.0005                  | 559 (37.8)   | 575 (38.9)  | 0.0214                  |
| Triple vessel disease                         | 1603 (24.8)    | 1624 (25.1) | 0.0083                  | 514 (34.8)   | 511 (34.6)  | -0.0014                 |
| Left main disease                             | 601 (9.3)      | 610 (9.4)   | 0.0040                  | 199 (13.5)   | 189 (12.8)  | -0.0187                 |
| NYHA Class within 2 weeks, No (%)             |                |             | 0.0050                  |              |             | 0.0012                  |
| Class I or II                                 | 1378 (21.3)    | 1367 (21.1) |                         | 181 (12.3)   | 180 (12.2)  |                         |
| Class III or IV                               | 5029 (77.7)    | 5060 (78.2) |                         | 1286 (87.1)  | 1289 (87.3) |                         |
| Five meter walk test                          |                |             | 0.0218                  |              |             | 0.0396                  |

|                 |                                   |                |                |         |             |             |         |
|-----------------|-----------------------------------|----------------|----------------|---------|-------------|-------------|---------|
|                 | Slowest (>10 seconds)             | 1909<br>(29.5) | 1859<br>(28.7) |         | 478 (32.4)  | 457 (30.9)  |         |
|                 | Slow (>6 seconds but ≤10 seconds) | 2342<br>(36.2) | 2354<br>(36.4) |         | 471 (31.9)  | 498 (33.7)  |         |
|                 | Normal (≤6 seconds)               | 1285<br>(19.9) | 1334<br>(20.6) |         | 266 (18.0)  | 264 (17.9)  |         |
|                 | Walk test not performed           | 918 (14.2)     | 917 (14.2)     |         | 260 (17.6)  | 257 (17.4)  |         |
| Laboratory data |                                   |                |                |         |             |             |         |
|                 | GFR, mean (SD)                    | 64.4 (24.9)    | 64.4 (24.5)    | 0.0021  | 59.8 (24.3) | 60.9 (23.8) | 0.0454  |
|                 | GFR category, N (%)               |                |                | 0.0073  |             |             | 0.0157  |
|                 | GFR ≥ 60                          | 3542<br>(54.7) | 3518<br>(54.4) |         | 715 (48.4)  | 704 (47.7)  |         |
|                 | 30 ≤ GFR < 60                     | 2585<br>(39.9) | 2610<br>(40.3) |         | 645 (43.7)  | 656 (44.4)  |         |
|                 | On dialysis or GFR < 30           | 328 (5.1)      | 330 (5.1)      |         | 114 (7.7)   | 114 (7.7)   |         |
|                 | Hemoglobin, mean (SD), g/dL       | 12.0 (1.9)     | 12.0 (1.9)     | -0.0016 | 11.9 (1.8)  | 11.9 (1.9)  | 0.0147  |
|                 | Albumin, mean (SD), g/dL          | 3.8 (0.5)      | 3.8 (0.5)      | 0.0163  | 3.6 (0.5)   | 3.6 (0.5)   | -0.0047 |

| Characteristics               | Preserved EF                         |                | Standardized difference | Reduced EF |                | Standardized difference |         |
|-------------------------------|--------------------------------------|----------------|-------------------------|------------|----------------|-------------------------|---------|
|                               | RAS (-)                              | RAS (+)        |                         | RAS (-)    | RAS (+)        |                         |         |
|                               | (N=6471)                             | (N=6471)       |                         | (N=1477)   | (N=1477)       |                         |         |
| Pre-procedure echocardiogram  |                                      |                |                         |            |                |                         |         |
|                               | LVEF, mean (SD), %                   | 56.8 (4.7)     | 56.8 (4.9)              | -0.0036    | 30.6 (7.1)     | 30.6 (7.1)              | -0.0023 |
|                               | LV systolic diameter, mean (SD), cm  | 3.0 (0.7)      | 3.0 (0.8)               | 0.0098     | 4.4 (0.9)      | 4.3 (0.9)               | -0.0057 |
|                               | LV diastolic diameter, mean (SD), cm | 4.5 (0.8)      | 4.5 (0.8)               | 0.0095     | 5.3 (0.9)      | 5.3 (0.9)               | -0.0045 |
| Post-procedure echocardiogram |                                      |                |                         |            |                |                         |         |
|                               | Moderate/severe AR, N (%)            | 219 (4.0)      | 220 (4.0)               | -0.0030    | 70 (5.5)       | 72 (5.7)                | 0.0099  |
|                               | Moderate/severe MR, N (%)            | 742 (13.4)     | 759 (13.8)              | 0.0042     | 321 (25.4)     | 337 (26.7)              | 0.0077  |
| Medication at discharge       |                                      |                |                         |            |                |                         |         |
|                               | Beta blocker, N (%)                  | 4341<br>(67.1) | 4320<br>(66.8)          | -0.0066    | 1161<br>(78.6) | 1155<br>(78.2)          | -0.0099 |
| In-hospital complication      |                                      |                |                         |            |                |                         |         |
|                               | Myocardial infarction, N (%)         | 11 (0.2)       | 16 (0.2)                | 0.0175     | 0 (0.0)        | 1 (0.1)                 | 0.0368  |
|                               | Stroke, N (%)                        | 115 (1.8)      | 104 (1.6)               | -0.0129    | 20 (1.4)       | 20 (1.4)                | 0       |
|                               | Vascular complication, N (%)         | 255 (3.9)      | 254 (3.9)               | -0.0010    | 54 (3.7)       | 50 (3.4)                | -0.0147 |
|                               | New requirement for dialysis, N (%)  | 3 (0.0)        | 4 (0.1)                 | 0.0079     | 0 (0.0)        | 2 (0.1)                 | 0.0521  |

Abbreviations: LVEF = left ventricular ejection fraction; RAS = renin-angiotensin system; SD = standard deviation; STS PROM = Society of Thoracic Surgeons predicted risk of mortality; CABG = coronary artery bypass graft surgery; ICD = intra-cardiac defibrillator; NYHA = New York Heart Association; GFR = glomerular filtration rate; LV = left ventricular; AR = aortic regurgitation; MR = mitral regurgitation

**eTable 4.** Baseline characteristics of those who were included versus excluded in KCCQ cohort

|                                               | Not Included in KCCQ Cohort | Included in KCCQ Cohort | P-value |
|-----------------------------------------------|-----------------------------|-------------------------|---------|
|                                               | (N=11059)                   | (N=4837)                |         |
| KCCQ Score                                    |                             |                         | <0.001  |
| 1-year KCCQ Overall Score, mean (SD)          | 75.2 (22.2)                 | 77.0 (21.2)             |         |
| Baseline KCCQ Overall Score, mean (SD)        | 42.5 (23.8)                 | 44.7 (23.7)             |         |
| Age, mean (SD), y                             | 82.4 (6.9)                  | 82.5 (6.7)              | 0.47    |
| Body mass index, mean (SD), kg/m <sup>2</sup> | 28.2 (6.6)                  | 28.6 (6.4)              | <.001   |
| Female, No. (%)                               | 5247 (47.4)                 | 2392 (49.5)             | 0.02    |
| Male, No. (%)                                 | 5810 (52.5)                 | 2444 (50.5)             |         |
| STS PROM, mean (SD), %                        | 7.7 (5.3)                   | 6.9 (4.4)               | <.001   |
| STS PROM category, N (%)                      |                             |                         | <.001   |
| STS PROM ≥ 15 (prohibitive risk)              | 938 (8.5)                   | 280 (5.8)               |         |
| 8 ≤ STS PROM < 15 (high risk)                 | 2942 (26.6)                 | 1094 (22.6)             |         |
| 4 ≤ STS PROM < 8 (intermediate risk)          | 4802 (43.4)                 | 2235 (46.2)             |         |
| STS PROM < 4 (low risk)                       | 2377 (21.5)                 | 1228 (25.4)             |         |
| Medical History, No. (%)                      |                             |                         |         |
| Prior CABG                                    | 3143 (28.4)                 | 1412 (29.2)             | 0.32    |
| Prior aortic valve procedure                  | 1445 (13.1)                 | 544 (11.2)              | 0.001   |
| Permanent pacemaker or ICD                    | 2043 (18.5)                 | 815 (16.8)              | 0.01    |
| Atrial fibrillation or flutter                | 4552 (41.2)                 | 1793 (37.1)             | <.001   |
| Prior stroke                                  | 1410 (12.7)                 | 573 (11.8)              | 0.11    |
| Prior transient ischemic attack               | 971 (8.8)                   | 467 (9.7)               | 0.08    |
| Peripheral arterial disease                   | 3460 (31.3)                 | 1385 (28.6)             | <.001   |
| Hypertension                                  | 10318 (93.3)                | 4524 (93.5)             | 0.62    |
| Diabetes Mellitus                             | 4285 (38.7)                 | 1866 (38.6)             | 0.82    |
| Chronic lung disease                          | 2838 (25.7)                 | 1101 (22.8)             | <.001   |
| Prior myocardial infarction                   | 2667 (24.1)                 | 1158 (23.9)             | 0.77    |
| Triple vessel disease                         | 2945 (26.6)                 | 1307 (27.0)             | 0.63    |
| Left main disease                             | 1106 (10.0)                 | 493 (10.2)              | 0.77    |

|  | Not Included | Included | P-value |
|--|--------------|----------|---------|
|  | (N=11059)    | (N=4837) |         |

|                                      |             |             |       |
|--------------------------------------|-------------|-------------|-------|
| NYHA Class within 2 weeks, No (%)    |             |             | <.001 |
| Class I or II (mild limitation)      | 1994 (18.0) | 1112 (23.0) |       |
| Class III or IV (severe limitation)  | 8964 (81.1) | 3700 (76.5) |       |
| Five meter walk test                 |             |             | <.001 |
| Slowest (>10 seconds)                | 3364 (30.4) | 1339 (27.7) |       |
| Slow (>6 seconds but ≤10 seconds)    | 3636 (32.9) | 2029 (41.9) |       |
| Normal (≤6 seconds)                  | 1960 (17.7) | 1189 (24.6) |       |
| Laboratory data                      |             |             |       |
| GFR, mean (SD)                       | 63.1 (24.9) | 64.9 (24.1) | <.001 |
| GFR category, N (%)                  |             |             | <.001 |
| GFR ≥ 60                             | 5768 (52.2) | 2711 (56.0) |       |
| 30 ≤ GFR < 60                        | 4586 (41.5) | 1910 (39.5) |       |
| On dialysis or GFR < 30              | 676 (6.1)   | 210 (4.3)   |       |
| Hemoglobin, mean (SD), g/dL          | 11.9 (1.9)  | 12.1 (1.8)  | <.001 |
| Albumin, mean (SD), g/dL             | 3.7 (0.5)   | 3.7 (0.5)   | 0.13  |
| Pre-procedure echocardiogram         |             |             |       |
| LVEF, mean (SD), %                   | 51.7 (11.7) | 52.5 (11.0) | 0.01  |
| LV systolic diameter, mean (SD), cm  | 3.3 (0.9)   | 3.2 (0.9)   | <.001 |
| LV diastolic diameter, mean (SD), cm | 4.7 (0.9)   | 4.6 (0.8)   | <.001 |
| Post-procedure echocardiogram        |             |             |       |
| Moderate/severe AR, N (%)            | 432 (4.6)   | 149 (3.5)   | 0.004 |
| Moderate/severe MR, N (%)            | 1518 (16.2) | 641 (15.3)  | 0.11  |
| Medication at discharge              |             |             |       |
| Beta blocker, N (%)                  | 7575 (68.5) | 3402 (70.3) | 0.02  |
| In-hospital complication             |             |             |       |
| Myocardial infarction, N (%)         | 19 (0.2)    | 9 (0.2)     | 0.85  |
| Stroke, N (%)                        | 217 (2.0)   | 42 (0.9)    | <.001 |
| Vascular complication, N (%)         | 440 (4.0)   | 173 (3.6)   | 0.22  |
| New requirement for dialysis, N (%)  | 8 (0.1)     | 1 (0)       | 0.21  |

Abbreviations: KCCQ = Kansas City Cardiomyopathy Questionnaire; SD = standard deviation; STS PROM = Society of Thoracic Surgeons predicted risk of mortality; CABG = coronary artery bypass graft surgery; ICD = intra-cardiac defibrillator; NYHA = New York Heart Association;



GFR = glomerular filtration rate; LVEF = left ventricular ejection fraction; LV = left ventricular;  
AR = aortic regurgitation; MR = mitral regurgitation

**eTable 5.** Association between the prescription of an RAS inhibitor at discharge and clinical outcomes by the type of an RAS inhibitor

|                                                    | Event Rate, %    |                   | ARD (95% CI), %        | HR (95% CI)         | P-value |
|----------------------------------------------------|------------------|-------------------|------------------------|---------------------|---------|
|                                                    | ACE-I or ARB (+) | RAS inhibitor (-) |                        |                     |         |
|                                                    | N=5249 for ACE-I | N=7948            |                        |                     |         |
|                                                    | N=2820 for ARB   |                   |                        |                     |         |
| <u>ACE-I (+) vs. RAS inhibitor (-)<sup>a</sup></u> |                  |                   |                        |                     |         |
| Mortality                                          | 13.1%            | 14.9%             | -1.88 (-3.09 to -0.68) | 0.86 (0.78 to 0.95) | 0.002   |
| HF Readmission                                     | 12.0%            | 13.8%             | -1.83 (-3.00 to -0.66) | 0.86 (0.78 to 0.95) | 0.004   |
| <u>ARB (+) vs. RAS inhibitor (-)<sup>a</sup></u>   |                  |                   |                        |                     |         |
| Mortality <sup>b</sup>                             | 11.5%            | 14.9%             | -3.48 (-4.89 to -2.07) | 0.78 (0.69 to 0.88) | <.001   |
| HF Readmission <sup>b</sup>                        | 12.4%            | 13.8%             | -1.43 (-2.87 to 0.01)  | 0.93 (0.82 to 1.05) | 0.226   |

Abbreviations: RAS, renin-angiotensin system; ACE-I, angiotensin-converting enzyme inhibitor; ARB, angiotensin-receptor blockers; ARD, absolute risk difference; HR, hazard ratio; HF, heart failure

a. Among 15896 matched patients, 5249 patients were on ACE-I, 2820 were on ARB, and 121 were on both.

b. Adjusted for variables with >0.1 of standardized difference (left ventricular ejection fraction, left ventricular systolic dimension, and sex)

**eTable 6.** The comparison of baseline characteristics between matched and unmatched patients

|                                               | Not Included in Matched Cohort | Included in Matched cohort | P-value |
|-----------------------------------------------|--------------------------------|----------------------------|---------|
|                                               | (N=5416)                       | (N=15896)                  |         |
| Age, mean (SD), y                             | 83.2 (7.0)                     | 82.4 (6.8)                 | <.001   |
| Body mass index, mean (SD), kg/m <sup>2</sup> | 27.2 (6.1)                     | 28.3 (6.6)                 | <.001   |
| Female, No. (%)                               | 2431 (44.9)                    | 7639 (48.1)                | <.001   |
| Male, No. (%)                                 | 2985 (55.1)                    | 8254 (51.9)                |         |
| STS PROM, mean (SD), %                        | 9.4 (7.2)                      | 7.5 (5.1)                  | <.001   |
| STS PROM category, N (%)                      |                                |                            | <.001   |
| STS PROM ≥ 15 (prohibitive risk)              | 826 (15.3)                     | 1218 (7.7)                 |         |
| 8 ≤ STS PROM < 15 (high risk)                 | 1550 (28.6)                    | 4036 (25.4)                |         |
| 4 ≤ STS PROM < 8 (intermediate risk)          | 2047 (37.8)                    | 7037 (44.3)                |         |
| STS PROM < 4 (low risk)                       | 993 (18.3)                     | 3605 (22.7)                |         |
| Medical History, No. (%)                      |                                |                            |         |
| Prior CABG                                    | 1211 (22.4)                    | 4555 (28.7)                | <.001   |
| Prior aortic valve procedure                  | 789 (14.6)                     | 1989 (12.5)                | <.001   |
| Permanent pacemaker or ICD                    | 1165 (21.5)                    | 2858 (18.0)                | <.001   |
| Atrial fibrillation or flutter                | 2670 (49.3)                    | 6345 (39.9)                | <.001   |
| Prior stroke                                  | 579 (10.7)                     | 1983 (12.5)                | <.001   |
| Prior transient ischemic attack               | 466 (8.6)                      | 1438 (9.0)                 | 0.33    |
| Peripheral arterial disease                   | 1547 (28.6)                    | 4845 (30.5)                | 0.01    |
| Hypertension                                  | 4397 (81.2)                    | 14842 (93.4)               | <.001   |
| Diabetes Mellitus                             | 637 (39.9)                     | 2082 (33.8)                | <.001   |
| Chronic lung disease                          | 1667 (30.8)                    | 3939 (24.8)                | <.001   |

|                                     |             |              |       |
|-------------------------------------|-------------|--------------|-------|
| Prior myocardial infarction         | 1245 (23.0) | 3825 (24.1)  | 0.11  |
| Triple vessel disease               | 1322 (24.4) | 4252 (26.7)  | <.001 |
| Left main disease                   | 492 (9.1)   | 1599 (10.1)  | 0.04  |
| NYHA Class within 2 weeks, No (%)   |             |              | <.001 |
| Class I or II (mild limitation)     | 939 (17.3)  | 3106 (19.5)  |       |
| Class III or IV (severe limitation) | 4434 (81.9) | 12664 (79.7) |       |

|                                      | Not Included in<br>Matched Cohort | Included in<br>Matched cohort | P-value |
|--------------------------------------|-----------------------------------|-------------------------------|---------|
|                                      | (N=5416)                          | (N=15896)                     |         |
| Five meter walk test                 |                                   |                               | <.001   |
| Slowest (>10 seconds)                | 1673 (30.9)                       | 4703 (29.6)                   |         |
| Slow (>6 seconds but ≤10 seconds)    | 1825 (33.7)                       | 5665 (35.6)                   |         |
| Normal (≤6 seconds)                  | 1011 (18.7)                       | 3149 (19.8)                   |         |
| Laboratory data                      |                                   |                               |         |
| GFR, mean (SD)                       | 56.9 (28.4)                       | 63.7 (24.6)                   | <.001   |
| GFR category, N (%)                  |                                   |                               | <.001   |
| GFR ≥ 60                             | 2236 (41.3)                       | 8479 (53.3)                   |         |
| 30 ≤ GFR < 60                        | 2253 (41.6)                       | 6496 (40.9)                   |         |
| On dialysis or GFR < 30              | 925 (17.1)                        | 886 (5.6)                     |         |
| Hemoglobin, mean (SD), g/dL          | 11.6 (2.0)                        | 12.0 (1.9)                    | <.001   |
| Albumin, mean (SD), g/dL             | 3.6 (0.5)                         | 3.7 (0.5)                     | <.001   |
| Pre-procedure echocardiogram         |                                   |                               |         |
| LVEF, mean (SD), %                   | 52.3 (11.1)                       | 51.9 (11.5)                   | <.001   |
| LV systolic diameter, mean (SD), cm  | 3.2 (0.9)                         | 3.3 (0.9)                     | <.001   |
| LV diastolic diameter, mean (SD), cm | 4.5 (0.9)                         | 4.6 (0.9)                     | <.001   |

|                                     |             |              |       |
|-------------------------------------|-------------|--------------|-------|
| Post-procedure echocardiogram       |             |              |       |
| Moderate/severe AR, N (%)           | 261 (5.6)   | 581 (4.3)    | <.001 |
| Moderate/severe MR, N (%)           | 1051 (22.7) | 2159 (15.9)  | <.001 |
| Medication at discharge             |             |              |       |
| Beta blocker, N (%)                 | 3656 (67.5) | 10977 (69.1) | 0.03  |
| In-hospital complication            |             |              |       |
| Myocardial infarction, N (%)        | 15 (0.3)    | 28 (0.2)     | 0.15  |
| Stroke, N (%)                       | 101 (1.9)   | 259 (1.6)    | 0.25  |
| Vascular complication, N (%)        | 234 (4.3)   | 613 (3.9)    | 0.13  |
| New requirement for dialysis, N (%) | 93 (1.7)    | 9 (0.1)      | <.001 |

Abbreviations: SD = standard deviation; STS PROM = Society of Thoracic Surgeons predicted risk of mortality; CABG = coronary artery bypass graft surgery; ICD = intra-cardiac defibrillator; NYHA = New York Heart Association; GFR = glomerular filtration rate; LVEF = left ventricular ejection fraction; LV = left ventricular; AR = aortic regurgitation; MR = mitral regurgitation
